# Supplementary material
Source: PubMed Central journal article supplement (PMC10754392)
Supplement: NIHMS1947843-supplement-1.pdf [file NIHMS1947843-supplement-1.pdf]

## SUPPLEMENTARY TABLES

**Extended Data Table 1. Crystallographic statistics**

|                                                     | Lettuce–DFHBI-1T                                      | Lettuce–DFHBI-1T<br>Thallium I Dataset                | Lettuce–DFHO                                          | Lettuce–DFAME                                         |
|-----------------------------------------------------|-------------------------------------------------------|-------------------------------------------------------|-------------------------------------------------------|-------------------------------------------------------|
| <b>Data collection*<sup>†</sup></b>                 |                                                       |                                                       |                                                       |                                                       |
| Beamline                                            | APS 24-ID-E                                           | APS 24-ID-C                                           | APS 24-ID-E                                           | ALS 5.01                                              |
| Wavelength (Å)                                      | 0.912                                                 | 0.976                                                 | 0.912                                                 | 0.977                                                 |
| Space group                                         | <i>P</i> 2 <sub>1</sub> 2 <sub>1</sub> 2 <sub>1</sub> |
| Cell dimensions                                     |                                                       |                                                       |                                                       |                                                       |
| <i>a</i> , <i>b</i> , <i>c</i> (Å)                  | 25.01 44.42 118.92                                    | 24.65 42.82 119.53                                    | 24.57 42.28 119.13                                    | 24.88 43.02 119.62                                    |
| $\alpha$ , $\beta$ , $\gamma$ (°)                   | 90 90 90                                              | 90 90 90                                              | 90 90 90                                              | 90 90 90                                              |
| Resolution (Å)                                      | 59.46 - 2.5                                           | 119.53 - 2.27                                         | 119.13 - 2.01                                         | 59.81 - 2.90                                          |
| <i>R</i> <sub>merge</sub>                           | 0.102 (0.287)                                         | 0.127 (1.223)                                         | 0.065 (2.844)                                         | 0.070 (0.269)                                         |
| <i>CC</i> <sub>1/2</sub>                            | 0.998 (0.956)                                         | 0.996 (0.689)                                         | 0.998 (0.382)                                         | 0.994 (0.987)                                         |
| $\langle I \rangle / \langle \sigma(I) \rangle$     | 13.9 (2.0)                                            | 12.6 (1.4)                                            | 15.6 (0.8)                                            | 20.0 (3.1)                                            |
| Completeness (%)                                    | 97.63 (99.79)                                         | 99.8 (98.0)                                           | 99.5 (99.4)                                           | 99.91 (100.0)                                         |
| Redundancy                                          | 10.2 (11.62)                                          | 12.1 (13.2)                                           | 12.5 (13.5)                                           | 11.46 (12.39)                                         |
| <b>Refinement</b>                                   |                                                       |                                                       |                                                       |                                                       |
| Resolution (Å)                                      | 41.61 - 2.5 (2.59 - 2.5)                              | 59.77 - 2.5 (2.59 - 2.5)                              | 59.57 - 2.60 (2.69 - 2.60)                            | 40.48 - 3.0 (3.10 - 3.0)                              |
| Unique reflections                                  | 4869 (473)                                            | 4773 (444)                                            | 4167 (409)                                            | 2870 (296)                                            |
| <i>R</i> <sub>work</sub> / <i>R</i> <sub>free</sub> | 0.225 / 0.268                                         | 0.212 / 0.251                                         | 0.214 / 0.265                                         | 0.228 / 0.291                                         |
| No. atoms                                           |                                                       |                                                       |                                                       |                                                       |
| DNA                                                 | 1153                                                  | 1110                                                  | 1091                                                  | 1120                                                  |
| Ligand/ion                                          | 28                                                    | 28                                                    | 26                                                    | 29                                                    |
| Water                                               | 17                                                    | 29                                                    | 18                                                    | 16                                                    |
| <i>B</i> -factors (Å <sup>2</sup> )                 |                                                       |                                                       |                                                       |                                                       |
| DNA                                                 | 59.77                                                 | 61.69                                                 | 72.26                                                 | 53.07                                                 |
| Ligand/ion                                          | 49.64                                                 | 53.25                                                 | 60.41                                                 | 44.76                                                 |
| Water                                               | 45.98                                                 | 52.41                                                 | 59.82                                                 | 41.20                                                 |
| R.m.s. deviations                                   |                                                       |                                                       |                                                       |                                                       |
| Bond lengths (Å)                                    | 0.005                                                 | 0.005                                                 | 0.011                                                 | 0.04                                                  |
| Bond angles (°)                                     | 0.78                                                  | 0.83                                                  | 1.23                                                  | 0.66                                                  |
| Mean precision (Å)                                  | 0.42                                                  | 0.39                                                  | 0.44                                                  | 0.41                                                  |
| PDB ID                                              | 8FHV                                                  | 8FHX                                                  | 8FHZ                                                  | 8FIO                                                  |

\*One crystal was used for each dataset. <sup>†</sup>Values in parentheses are for highest resolution shell.

Lettuce C20G –      Lettuce C20T –      Lettuce C20T –      Lettuce C20T –

| DFHO                     | DFHBI-1T                 | DFHO                     | DFAME                   |
|--------------------------|--------------------------|--------------------------|-------------------------|
| APS 24-ID-C              | APS 24-ID-C              | APS 24-ID-C              | APS 24-ID-C             |
| 1.105                    | 1.105                    | 1.105                    | 1.105                   |
| $P 2_12_12_1$            | $P 2_12_12_1$            | $P 2_12_12_1$            | $P 2_12_12_1$           |
| 25.81 46.99 120.98       | 24.84 44.56 119.59       | 24.57 43.10 117.64       | 25.02 43.95 120.10      |
| 90 90 90                 | 90 90 90                 | 90 90 90                 | 90 90 90                |
| 120.98 - 2.35            | 41.76 - 2.70             | 43.10 - 2.80             | 60.05 - 2.40            |
| 0.154 (2.191)            | 0.174 (0.563)            | 0.164 (0.442)            | 0.113 (0.527)           |
| 0.985 (0.496)            | 0.998 (0.860)            | 0.996 (0.958)            | 0.998 (0.916)           |
| 9.6 (0.9)                | 10.7 (1.0)               | 22.8 (2.50)              | 19.3 (1.1)              |
| 99.9 (100)               | 99.0 (97.38)             | 98.63 (98.79)            | 98.48 (100.0)           |
| 12.3 (13.1)              | 10.5 (10.49)             | 9.15 (10.97)             | 11.6 (11.74)            |
| 43.81 - 2.6 (2.69 - 2.6) | 35.73 - 3.0 (3.11 - 3.0) | 34.77 - 2.90 (3.0 - 2.9) | 41.28 - 2.8 (2.9 - 2.8) |
| 4913 (461)               | 2926 (290)               | 3048 (289)               | 3540 (330)              |
| 0.219 / 0.271            | 0.244 / 0.287            | 0.244 / 0.289            | 0.217 / 0.283           |
| 1115                     | 1154                     | 1121                     | 1117                    |
| 25                       | 27                       | 25                       | 28                      |
| 19                       | 9                        | 16                       | 16                      |
| 73.46                    | 61.25                    | 45.18                    | 43.08                   |
| 55.77                    | 53.09                    | 44.16                    | 41.47                   |
| 65.43                    | 50.07                    | 36.13                    | 37.01                   |
| 0.006                    | 0.004                    | 0.005                    | 0.006                   |
| 0.77                     | 0.70                     | 0.68                     | 0.75                    |
| 0.49                     | 0.24                     | 0.38                     | 0.23                    |
| 8FI1                     | 8FI2                     | 8FI7                     | 8FI8                    |

\*One crystal was used for each dataset. †Values in parentheses are for highest resolution shell.

**Extended Data Table 2. Cryo-EM data collection and processing parameters**

| <b>Unliganded Lettuce</b>                    |                 |
|----------------------------------------------|-----------------|
| Microscope                                   | Glacios         |
| Voltage (keV)                                | 200             |
| Nominal Magnification                        | 105,000x        |
| Cumulative Exposure (e/Å <sup>2</sup> )      | 52              |
| Detector                                     | Falcon 4        |
| Pixel Size (Å/pix)                           | 0.9             |
| Defocus Range (μm)                           | (-0.8) – (-2.2) |
| Micrographs Used (no.)                       | 3,327           |
| Total Extracted Particles <sup>1</sup> (no.) | 1,105,996       |
| Refined Particles (no.)                      | 55,288          |
| Map Resolution <sup>2</sup> (Å)              | 6.5             |
| EMDB ID                                      | EMD-29329       |

1. Total extracted particles are defined as the particles obtained after Topaz picking.

2. Resolution was calculated based on the FSC-curve at the value of 0.143.

**Extended Data Table 3. Pucker angle analysis**

| Position | Lettuce DNA aptamer<br>(8 structures) |                 |                  | Deoxyribozyme<br>9DB1 <sup>5</sup> |       | Deoxyribozyme<br>Dz36 <sup>6</sup> |       | <i>i</i> Spinach RNA<br>aptamer <sup>7</sup> |       |
|----------|---------------------------------------|-----------------|------------------|------------------------------------|-------|------------------------------------|-------|----------------------------------------------|-------|
|          | Nucleotide                            | Angle<br>mean   | Standard<br>dev. | Nucleotide                         | Angle | Nucleotide                         | Angle | Nucleotide                                   | Angle |
| 1        | C                                     | 156             | 21.7             | A                                  | 3     | T                                  | 165   | G                                            | 6     |
| 2        | T                                     | 155             | 8.4              | T                                  | 13    | G                                  | 105   | G                                            | 6     |
| 3        | T                                     | 158             | 5.1              | C                                  | 17    | T                                  | 109   | G                                            | 8     |
| 4        | A                                     | 154             | 18.4             | C                                  | 164   | A                                  | 123   | A                                            | 9     |
| 5        | G                                     | 139             | 6.5              | G                                  | 164   | A                                  | 151   | G                                            | 14    |
| 6        | T                                     | 156             | 18.0             | A                                  | 150   | C                                  | 125   | U                                            | 16    |
| 7        | A                                     | 148             | 4.7              | T                                  | 144   | G                                  | 153   | A                                            | 14    |
| 8        | G                                     | 142             | 11.0             | G                                  | 163   | C                                  | 86    | C                                            | 15    |
| 9        | G                                     | 172             | 34.2             | G                                  | 145   | A                                  | 166   | G                                            | 11    |
| 10       | G                                     | 142             | 5.4              | A                                  | 148   | C                                  | 144   | G                                            | 14    |
| 11       | A                                     | 32              | 13.3             | T                                  | 152   | T                                  | 151   | U                                            | 12    |
| 12       | T                                     | 24              | 5.0              | C                                  | 191   | G                                  | 25    | G                                            | 9     |
| 13       | G                                     | 11              | 1.8              | A                                  | 201   | C                                  | 146   | A                                            | 21    |
| 14       | A                                     | 164             | 21.3             | T                                  | 354   | C                                  | 149   | G                                            | 17    |
| 15       | T                                     | 140             | 29.9             | A                                  | 135   | A                                  | 185   | G                                            | 160   |
| 16       | G                                     | 149             | 16.3             | C                                  | 40    | G                                  | 19    | G                                            | 150   |
| 17       | C                                     | 101             | 31.5             | G                                  | 173   | C                                  | 210   | U                                            | 164   |
| 18       | G                                     | 159             | 31.1             | G                                  | 183   | G                                  | 178   | C                                            | 18    |
| 19       | G                                     | 176             | 22.3             | T                                  | 161   | G                                  | 79    | G                                            | 8     |
| 20       | C, G or T                             | 154             | 23.4             | C                                  | 0     | C                                  | 59    | G                                            | 13    |
| 21       | A                                     | 186             | 9.9              | G                                  | 185   | T                                  | 47    | G                                            | 17    |
| 22       | G                                     | 147             | 23.1             | G                                  | 7     | C                                  | 156   | U                                            | 15    |
| 23       | T                                     | 145             | 5.4              | A                                  | 173   | G                                  | 138   | C                                            | 22    |
| 24       | G                                     | 179             | 6.1              | G                                  | 86    | A                                  | 164   | C                                            | 16    |
| 25       | G                                     | 154             | 18.5             | G                                  | 191   | A                                  | 142   | A                                            | 11    |
| 26       | G                                     | 115             | 59.9             | G                                  | 190   | A                                  | 144   | G                                            | 11    |
| 27       | C                                     | 124             | 54.2             | G                                  | 182   | T                                  | 108   | U                                            | 13    |
| 28       | T                                     | 81              | 45.5             | T                                  | 195   | C                                  | 46    | A                                            | 15    |
| 29       | T                                     | 162             | 1.9              | T                                  | 193   | T                                  | 160   | G                                            | 7     |
| 30       | C                                     | 152             | 45.1             | T                                  | 208   | C                                  | 125   | G                                            | 18    |
| 31       | G                                     | 183             | 12.6             | G                                  | 5     | T                                  | 152   | U                                            | 15    |
| 32       | C                                     | 155             | 3.2              | C                                  | 15    | C                                  | 127   | A                                            | 167   |
| 33       | A                                     | 172             | 8.5              | C                                  | 1     | T                                  | 130   | C                                            | 161   |
| 34       | G                                     | 149             | 11.4             | G                                  | 5     | C                                  | 42    | G                                            | 22    |
| 35       | T                                     | 71              | 25.5             | T                                  | 20    | G                                  | 17    | C                                            | 14    |
| 36       | T                                     | Disordered loop |                  | T                                  | 134   | T                                  | 31    | C                                            | 10    |
| 37       | C                                     | Disordered loop |                  | T                                  | 128   | -                                  | -     | U                                            | 18    |

|    |   |                 |      |   |     |   |   |   |     |
|----|---|-----------------|------|---|-----|---|---|---|-----|
| 38 | C | Disordered loop |      | A | 51  | - | - | A | 11  |
| 39 | T | 150             | 32.9 | A | 32  | - | - | C | 13  |
| 40 | G | 158             | 23.5 | G | 353 | - | - | U | 14  |
| 41 | C | 192             | 7.6  | T | 359 | - | - | G | 23  |
| 42 | G | 16              | 11.2 | G | 21  | - | - | U | 133 |
| 43 | A | 188             | 14.7 | C | 19  | - | - | U | 28  |
| 44 | G | 153             | 18.9 | C | 147 | - | - | G | 25  |
| 45 | G | 183             | 9.0  | - | -   | - | - | A | 168 |
| 46 | G | 104             | 35.2 | - | -   | - | - | G | 17  |
| 47 | G | 57              | 38.5 | - | -   | - | - | U | 164 |
| 48 | A | 158             | 13.6 | - | -   | - | - | A | 161 |
| 49 | C | 130             | 31.4 | - | -   | - | - | G | 72  |
| 50 | T | 164             | 11.6 | - | -   | - | - | A | 154 |
| 51 | A | 159             | 17.9 | - | -   | - | - | G | 162 |
| 52 | A | 135             | 11.0 | - | -   | - | - | U | 163 |
| 53 | G | 163             | 20.5 | - | -   | - | - | G | 21  |
| 54 | - | -               | -    | - | -   | - | - | U | 39  |
| 55 | - | -               | -    | - | -   | - | - | G | 1   |
| 56 | - | -               | -    | - | -   | - | - | G | 14  |
| 57 | - | -               | -    | - | -   | - | - | G | 14  |
| 58 | - | -               | -    | - | -   | - | - | C | 11  |
| 59 | - | -               | -    | - | -   | - | - | U | 22  |
| 60 | - | -               | -    | - | -   | - | - | C | 14  |
| 61 | - | -               | -    | - | -   | - | - | C | 14  |
| 62 | - | -               | -    | - | -   | - | - | G | 18  |
| 63 | - | -               | -    | - | -   | - | - | U | 357 |
| 64 | - | -               | -    | - | -   | - | - | A | 11  |
| 65 | - | -               | -    | - | -   | - | - | C | 352 |
| 66 | - | -               | -    | - | -   | - | - | U | 354 |
| 67 | - | -               | -    | - | -   | - | - | C | 18  |
| 68 | - | -               | -    | - | -   | - | - | C | 20  |
| 69 | - | -               | -    | - | -   | - | - | C | 16  |

**Extended Data Table 4. Sequences of constructs used in this study**

| Name                                                                           | Sequence, 5' to 3'                                                          |
|--------------------------------------------------------------------------------|-----------------------------------------------------------------------------|
| Lettuce w.t. - crystallization construct                                       | CTTAGT AGGGATGATGCGGCAGTGGGCTTCGCAGTTCCTGCGAGGGG ACTAAG                     |
| C20G - crystallization construct                                               | CTTAGT AGGGATGATGCGG <b>G</b> AGTGGGCTTCGCAGTTCCTGCGAGGGG ACTAAG            |
| C20T - crystallization construct                                               | CTTAGT AGGGATGATGCGG <b>T</b> AGTGGGCTTCGCAGTTCCTGCGAGGGG ACTAAG            |
| Lettuce w.t. - fluorescence experiments construct (f.c.) - modified P1 (4 nts) | CCGT AGGGATGATGCGGCAGTGGGCTTCGCAGTTCCTGCGAGGGG ACGG                         |
| Split Lettuce w.t. part 1                                                      | CTTAGT AGGGATGATGCGGCAGTGGGCTTCGCAG                                         |
| Split Lettuce w.t. part 2                                                      | CTGCGAGGGG ACTAAG                                                           |
| A11G                                                                           | CCGT AGGG <b>G</b> TGATGCGGAAGTGGGCTTCGCAGTTCCTGCGAGGGGACGG                 |
| A11C                                                                           | CCGT AGGG <b>C</b> TGATGCGGAAGTGGGCTTCGCAGTTCCTGCGAGGGG ACGG                |
| A11T                                                                           | CCGT AGGG <b>T</b> TGATGCGGAAGTGGGCTTCGCAGTTCCTGCGAGGGG ACGG                |
| G26A                                                                           | CCGT AGGGATGATGCGGCAGTGG <b>A</b> CTTCGCAGTTCCTGCGAGGGG ACGG                |
| G26T                                                                           | CCGT AGGGATGATGCGGCAGTGG <b>T</b> CTTCGCAGTTCCTGCGAGGGG ACGG                |
| C17G and G26C                                                                  | CCGT AGGGATGATG <b>GG</b> GCAGTGG <b>C</b> CTTCGCAGTTCCTGCGAGGGG ACGG       |
| C17T and G26A                                                                  | CCGT AGGGATGATG <b>T</b> GGCAGTGG <b>A</b> CTTCGCAGTTCCTGCGAGGGG ACGG       |
| C20G                                                                           | CCGT AGGGATGATGCGG <b>G</b> AGTGGGCTTCGCAGTTCCTGCGAGGGG ACGG                |
| C20A                                                                           | CCGT AGGGATGATGCGG <b>A</b> AGTGGGCTTCGCAGTTCCTGCGAGGGG ACGG                |
| C20T                                                                           | CCGT AGGGATGATGCGG <b>T</b> AGTGGGCTTCGCAGTTCCTGCGAGGGG ACGG                |
| C20 deletion (del)                                                             | CCGT AGGGATGATGCGG/ <del>del</del> /AGTGGGCTTCGCAGTTCCTGCGAGGGG ACGG        |
| G18I*                                                                          | CCGT AGGG ATGAT GC/ <b>I</b> /GC AGTGG GCTTC GCAGT TCCTG CGAGG GG ACGG      |
| C17>rC17, G18>rG18, G25>rG25, and G26>rG26*                                    | CCGT AGGGATGATG <b>rCrGrG</b> GCAGT <b>GrGrG</b> CTTCGCAGTTCCTGCGAGGGG ACGG |
| A14T and T29A                                                                  | CCGT AGGGATG <b>T</b> TGCGGCAGTGGGCT <b>AC</b> GCAGTTCCTGCGAGGGG ACGG       |
| A14G and T29C                                                                  | CCGT AGGGATG <b>G</b> TGCGGCAGTGGGCT <b>CC</b> GCAGTTCCTGCGAGGGG ACGG       |
| A14C and T29G                                                                  | CCGT AGGGATG <b>C</b> TGCGGCAGTGGGCT <b>GC</b> GCAGTTCCTGCGAGGGG ACGG       |
| T15A                                                                           | CCGT AGGGATG <b>A</b> AGCGGCAGTGGGCTTCGCAGTTCCTGCGAGGGG ACGG                |
| T28A                                                                           | CCGT AGGGATGATGCGGCAGTGGG <b>C</b> ATCGCAGTTCCTGCGAGGGG ACGG                |
| T15G and T28C                                                                  | CCGT AGGGATG <b>A</b> GGCGGCAGTGGG <b>C</b> TCGCAGTTCCTGCGAGGGG ACGG        |
| T15C and T28G                                                                  | CCGT AGGGATG <b>A</b> CGCGGCAGTGGG <b>C</b> TGCGAGTTCCTGCGAGGGG ACGG        |
| T15G, T28C, A14T and T29A                                                      | CCGT AGGGATG <b>TG</b> GCGGCAGTGGG <b>CAC</b> GCAGTTCCTGCGAGGGG ACGG        |
| A43 del                                                                        | CCGT AGGGATGATGCGGCAGTGGGCTTCGCAGTTCCTGCG/ <del>del</del> /GGGG ACGG        |
| A43G                                                                           | CCGT AGGGATGATGCGGCAGTGG GCTTCGCAGTTCCTGCG <b>G</b> GGG ACGG                |
| A43C                                                                           | CCGT AGGGATGATGCGGCAGTGGGCTTCGCAGTTCCTGCG <b>C</b> GGG ACGG                 |
| A43T                                                                           | CCGT AGGGATGATGCGGCAGTGGGCTTCGCAGTTCCTGCG <b>T</b> GGG ACGG                 |
| G44 del                                                                        | CCGT AGGGATGATGCGGCAGTGGGCTTCGCAGTTCCTGCGA/ <del>del</del> /GGG ACGG        |
| G44A                                                                           | CCGT AGGGATGATGCGGCAGTGGGCTTCGCAGTTCCTGCGA <b>A</b> GGG ACGG                |
| G44C                                                                           | CCGT AGGGATGATGCGGCAGTGGGCTTCGCAGTTCCTGCGA <b>C</b> GGG ACGG                |
| G44T                                                                           | CCGT AGGGATGATGCGGCAGTGGGCTTCGCAGTTCCTGCGA <b>T</b> GGG ACGG                |

|                                                                                                                                            |                                                                                                                                                                        |
|--------------------------------------------------------------------------------------------------------------------------------------------|------------------------------------------------------------------------------------------------------------------------------------------------------------------------|
| A7C                                                                                                                                        | CCGT <b>C</b> GGGATGATGCGGCAGTGGGCTTCGCAGTTCCTGCGAGGGG ACGG                                                                                                            |
| G8 del                                                                                                                                     | CCGT A/ <b>del</b> /GGATGATGCGGCAGTGGGCTTCGCAGTTCCTGCGAGGGG ACGG                                                                                                       |
| G22C                                                                                                                                       | CCGT AGGGATGATGCGGCA <b>C</b> TGGGCTTCGCAGTTCCTGCGAGGGG ACGG                                                                                                           |
| G47T                                                                                                                                       | CCGT AGGGATGATGCGGCAGTGGGCTTCGCAGTTCCTGCGAGGG <b>T</b> ACGG                                                                                                            |
| Minimization: 4 nts P1, 3 nts P2, and loop TTC                                                                                             | CCGT AGGGATGATGCGGCAGTGGGCTTCGCTTCGCGAGGGG ACGG                                                                                                                        |
| Minimization: 4 nts P1, 2 nts P2, and loop TTC                                                                                             | CCGT AGGGATGATGCGGCAGTGGGCTTCGTTCCGAGGGG ACGG                                                                                                                          |
| Minimization: 4 nts P1 and P2 del - just loop TTC                                                                                          | CCGT AGGGATGATGCGGCAGTGGGCTTTTCAGGGG ACGG                                                                                                                              |
| Circular permutation (C.P.) crystallization construct                                                                                      | CTGCG AGGGGACTAAGTTCCTTAGTAGGGATGATGCGGCAGTGGGCTT CGCAG                                                                                                                |
| C.P.: 4 nts P1 <sub>cp</sub> , and loop TTC                                                                                                | CTGCG AGGGGACGGTTCCTTAGGGATGATGCGGCAGTGGGCTT CGCAG                                                                                                                     |
| C.P.: 3 nts P1 <sub>cp</sub> , and loop TTC                                                                                                | CTGCG AGGGG ACGTTCCTAGGGATGATGCGGCAGTGGGCTT CGCAG                                                                                                                      |
| C.P.: 2 nts P1 <sub>cp</sub> , and loop TTC                                                                                                | CTGCG AGGGGACTTCGTAGGGATGATGCGGCAGTGGGCTT CGCAG                                                                                                                        |
| C.P.: 1 nt P1 <sub>cp</sub> , and loop TTC                                                                                                 | CTGCG AGGGGATTCTAGGGATGATGCGGCAGTGGGCTT CGCAG                                                                                                                          |
| C.P.: P1 <sub>cp</sub> del - just loop TTC                                                                                                 | CTGCG AGGGGTCAGGGATGATGCGGCAGTGGGCTT CGCAG                                                                                                                             |
| C.P.: P1 <sub>cp</sub> del - just loop TC                                                                                                  | CTGCG AGGGGTCAGGGATGATGCGGCAGTGGGCTT CGCAG                                                                                                                             |
| C.P.: P1 <sub>cp</sub> del - just loop T                                                                                                   | CTGCG AGGGGTAGGGATGATGCGGCAGTGGGCTT CGCAG                                                                                                                              |
| C.P.: P1 <sub>cp</sub> and loop TTC del                                                                                                    | CTGCG AGGGGAGGGATGATGCGGCAGTGGGCTT CGCAG                                                                                                                               |
| C.P. T15G, T28C, A14T and T29A: 4 nts P1 <sub>cp</sub> , and loop TTC                                                                      | CTGCG AGGGGACGGTTCCTTAGGGATG <b>TGG</b> CGGCAGTGGG <b>CCA</b> CGCAG                                                                                                    |
| C.P. T15G, T28C, A14T and T29A: 1 nt P1 <sub>cp</sub> , and loop TTC                                                                       | CTGCG AGGGGATTCTAGGGATG <b>TGG</b> CGGCAGTGGG <b>CCA</b> CGCAG                                                                                                         |
| C.P. T15G, T28C, A14T and T29A: 4 nts P2 <sub>cp</sub> , and P1 <sub>cp</sub> del - just loop T                                            | CGCG AGGGGTAGGGATG <b>TGG</b> CGGCAGTGGG <b>CCA</b> CGCG                                                                                                               |
| R-loop DNA Fwd with Lettuce C.P. T15>G, T28>C, A14>T and T29>A: 9 nts P2 <sub>cp</sub> and P1 <sub>cp</sub> del - just loop T (underlined) | CACTCCCAGAGTCGTGGCCGTAGGAAATCGCTTAAGATACACAGAATAT<br><u>CCTCAGTCGAGGGGTAGGGATGTGGCGGCAGTGGGCCACGACTGAGG</u><br>AATCTCTAGTCAAATTCCATCATCGTAGCGCTGAGGAATTTGGTGGACACTAGGA |
| R-loop DNA reverse complement                                                                                                              | TCCTAGTGCCACCAAATTCCTCAGCGCTACGATGATGGAATTTGACTAGAG<br>ATTCTCAGTCGTGGCCCACTGCCGCCACATCCCTACCCCTCGACTGAGGAT<br>ATTCTGTGTATCTTAAGCGATTTCTACGGCCACGACTCTGGGAGTG           |
| R-loop Fwd primer                                                                                                                          | CACTCCCAGAGTCGTGGCCGTAGG                                                                                                                                               |
| RNA used for R-loop formation                                                                                                              | GGAAUUCGUUAAAGAUACACAGAAUAUCCUCAGUCGAGGGGUAGGGGAUGUG<br>GCGGCAGUGGGCCACGACUGAGGAAUCUCUAGUCAAAUCCAUCAUCGU                                                               |
| RNA Lettuce w.t.                                                                                                                           | CUUAGUAGGGGAUGAUGCGGCAGUGGGCUUCGCAGUCCUGCGAGGGGACUAAG                                                                                                                  |
| RNA Split Lettuce part 2                                                                                                                   | CUGCGAGGGGACUAAG                                                                                                                                                       |

\* Custom synthesized by IDT.

## REFERENCES

- 1 Lin, C. H. & Patel, D. J. Structural basis of DNA folding and recognition in an AMP-DNA aptamer complex: distinct architectures but common recognition motifs for DNA and RNA aptamers complexed to AMP. *Chemistry & Biology* **4**, 817-832, doi:[https://doi.org/10.1016/S1074-5521\(97\)90115-0](https://doi.org/10.1016/S1074-5521(97)90115-0) (1997).
- 2 Robertson, S. A., Harada, K., Frankel, A. D. & Wemmer, D. E. Structure determination and binding kinetics of a DNA aptamer–argininamide complex. *Biochemistry* **39**, 946-954, doi:[10.1021/bi9915061](https://doi.org/10.1021/bi9915061) (2000).
- 3 Xu, G. *et al.* Structure-guided post-SELEX optimization of an ochratoxin A aptamer. *Nucleic Acids Res.* **47**, 5963-5972, doi:[10.1093/nar/gkz336](https://doi.org/10.1093/nar/gkz336) (2019).
- 4 Xu, G. *et al.* Structural insights into the mechanism of high-affinity binding of Ochratoxin A by a DNA aptamer. *J. Am. Chem. Soc.* **144**, 7731-7740, doi:[10.1021/jacs.2c00478](https://doi.org/10.1021/jacs.2c00478) (2022).
- 5 Ponce-Salvatierra, A., Wawrzyniak-Turek, K., Steuerwald, U., Höbartner, C. & Pena, V. Crystal structure of a DNA catalyst. *Nature* **529**, 231-234, doi:[10.1038/nature16471](https://doi.org/10.1038/nature16471) (2016).
- 6 Liu, H. *et al.* Crystal structure of an RNA-cleaving DNAzyme. *Nat. Commun.* **8**, 2006, doi:[10.1038/s41467-017-02203-x](https://doi.org/10.1038/s41467-017-02203-x) (2017).
- 7 Fernandez-Millan, P., Autour, A., Ennifar, E., Westhof, E. & Ryckelynck, M. Crystal structure and fluorescence properties of the iSpinach aptamer in complex with DFHBI. *RNA* **23**, 1788-1795, doi:[10.1261/rna.063008.117](https://doi.org/10.1261/rna.063008.117) (2017).



- 8 Li, S., Olson, W. K. & Lu, X.-J. Web 3DNA 2.0 for the analysis, visualization, and modeling of 3D nucleic acid structures. *Nucleic Acids Res.* **47**, W26-W34, doi:10.1093/nar/gkz394 (2019).
